# Supplementary material
Source: Springer Nature journal article supplement (https://www.springermedizin.de/resource/supplementary/12902_2014_235_MOESM1_ESM.pdf/9515814)
Supplement: MOESM1 [file 9515814]

(EXCHANGE OF)  
INFORMATIONAL  
SUPPORT

(EXCHANGE OF)  
EMOTIONAL SUPPORT

DIABETES-RELATED DISTRESS ↓

- QUALITY OF LIFE ↑  
- WELL-BEING ↑  
- SELF-MANAGEMENT  
BEHAVIOUR ↑
